# Supplementary material for: Controlled synthesis, growth mechanism and optical properties of FeWO4 hierarchical microstructures
Source: Royal Society of Chemistry journal article supplement (doi:10.1039/c1ce05416c), 2011-01-01
Supplement: c1ce05416c.pdf [file c1ce05416c.pdf]

## Supporting Information

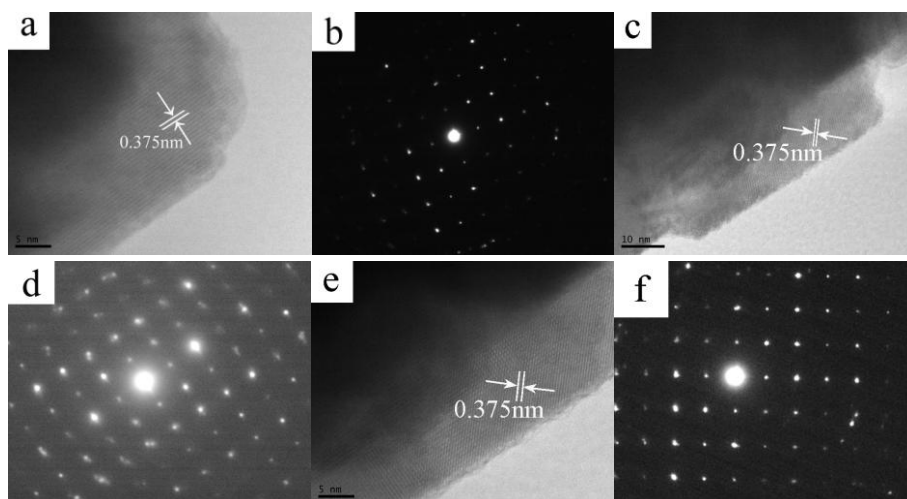

Figure S1. HRTEM images (a, c, e) and SEAD patterns (b, d, f) of  $\text{FeWO}_4$  microcrystals prepared at 200 °C for 8 h with concentration of HMT  $0.01 \text{ mol}\cdot\text{L}^{-1}$ ,  $0.1 \text{ mol}\cdot\text{L}^{-1}$ ,  $0.2 \text{ mol}\cdot\text{L}^{-1}$ , respectively.

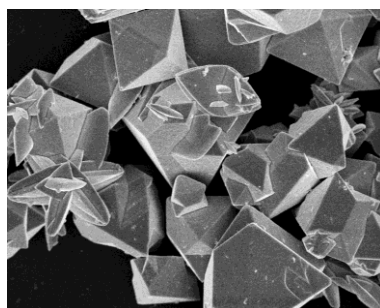

Figure S2. SEM images of the as-prepared samples at 200 °C for 8 h in presence of  $[\text{FeCl}_2] = 0.02 \text{ mol}\cdot\text{L}^{-1}$ ,  $[\text{Na}_2\text{WO}_4] = 0.02 \text{ mol}\cdot\text{L}^{-1}$  and  $[\text{Na}_2\text{EDTA}] = 0.03 \text{ mol}\cdot\text{L}^{-1}$ .
